# Supplementary material for: Differences in endosperm cell wall integrity in wheat (Triticum aestivum L.) milling fractions impact on the way starch responds to gelatinization and pasting treatments and its subsequent enzymatic in vitro digestibility
Source: Royal Society of Chemistry journal article supplement (doi:10.1039/c9fo00947g), 2019-01-01
Supplement: c9fo00947g1.pdf [file c9fo00947g1.pdf]

**Supplementary Table 1.** Pasting properties of 10.0 % w/w dry matter (dm) suspensions of regular and *Bacillus subtilis* endoxylanase (xylanase) treated flour and farina particles.

| Viscosity (mPa.s) | Control samples |             |               | Xylanase treated samples |             |               |
|-------------------|-----------------|-------------|---------------|--------------------------|-------------|---------------|
|                   | Flour           | Fine farina | Coarse farina | Flour                    | Fine farina | Coarse farina |
| Peak              | 1,315 ± 5       | 1,710 ± 10  | 1,155 ± 40    | 1,090 ± 15               | 1,420 ± 5   | 1,415 ± 15    |
| Hot paste         | 865 ± 5         | 1,170 ± 25  | 1,150 ± 30    | 720 ± 5                  | 940 ± 5     | 960 ± 5       |
| Breakdown         | 450 ± 10        | 535 ± 35    | -             | 370 ± 15                 | 480 ± 10    | 460 ± 5       |
| Cold paste        | 1,840 ± 10      | 2,500 ± 70  | 2,475 ± 65    | 1,535 ± 5                | 2,005 ± 50  | 2,065 ± 10    |
| Setback           | 975 ± 15        | 1,330 ± 45  | 1,330 ± 35    | 815 ± 5                  | 1,060 ± 45  | 1,100 ± 5     |

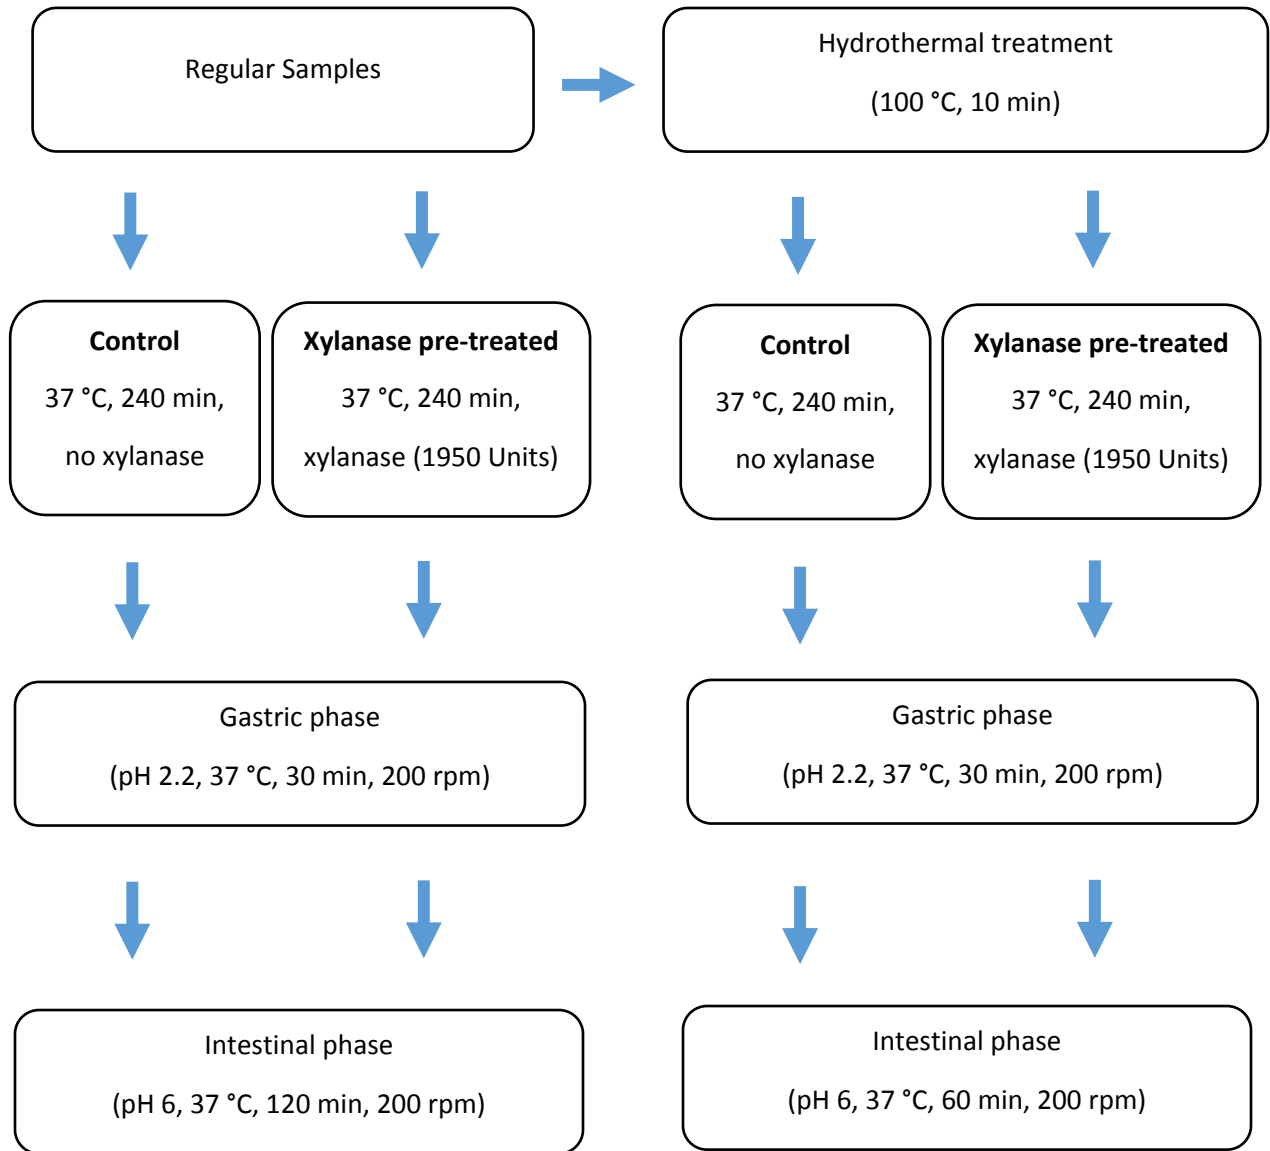

**Supplementary Figure 1.** Flowchart of the sample preparation before the *in vitro* digestion assay.

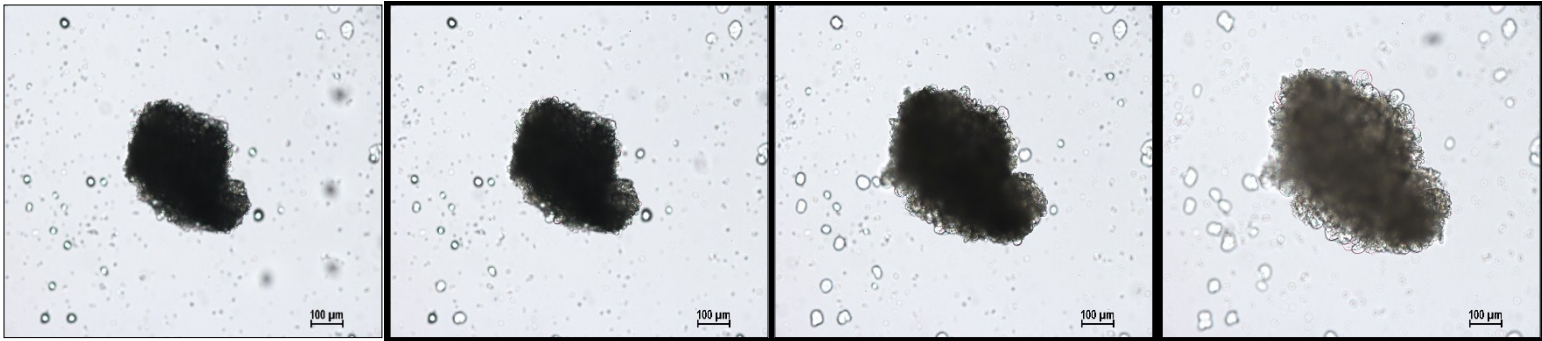

50 °C

55 °C

60 °C

65 °C

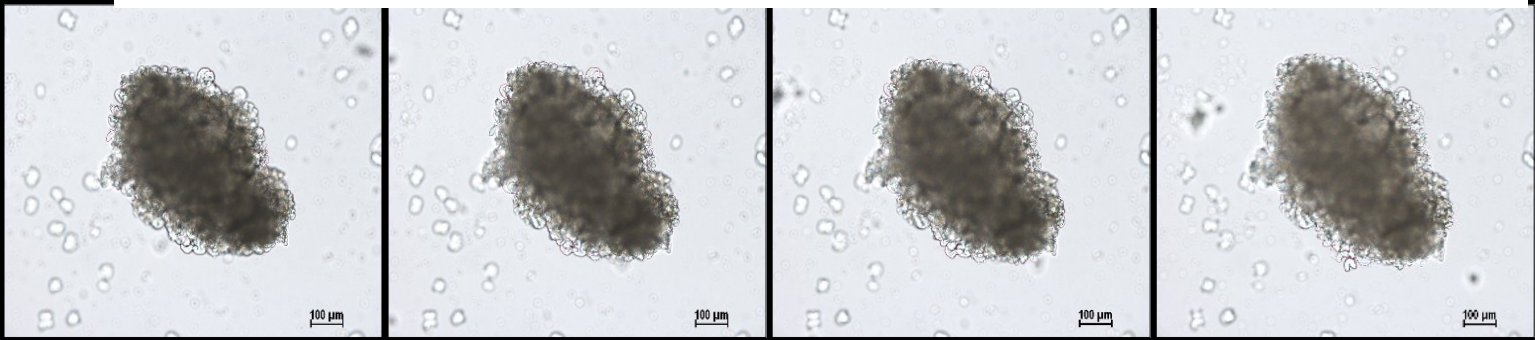

70 °C

75 °C

80 °C

85 °C

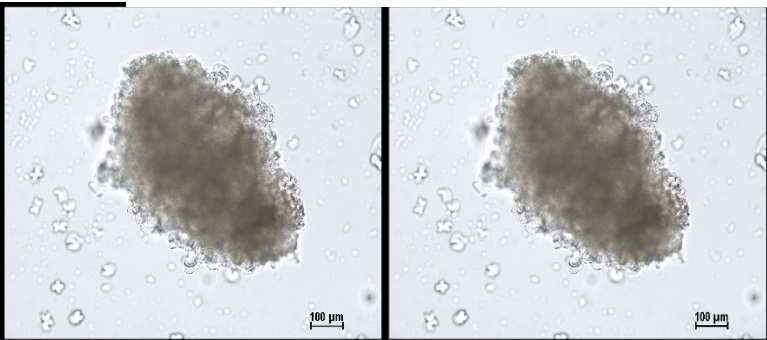

90 °C

95 °C

**Supplementary Figure 2.** Hot stage microscopy images of fine farina at different temperatures.

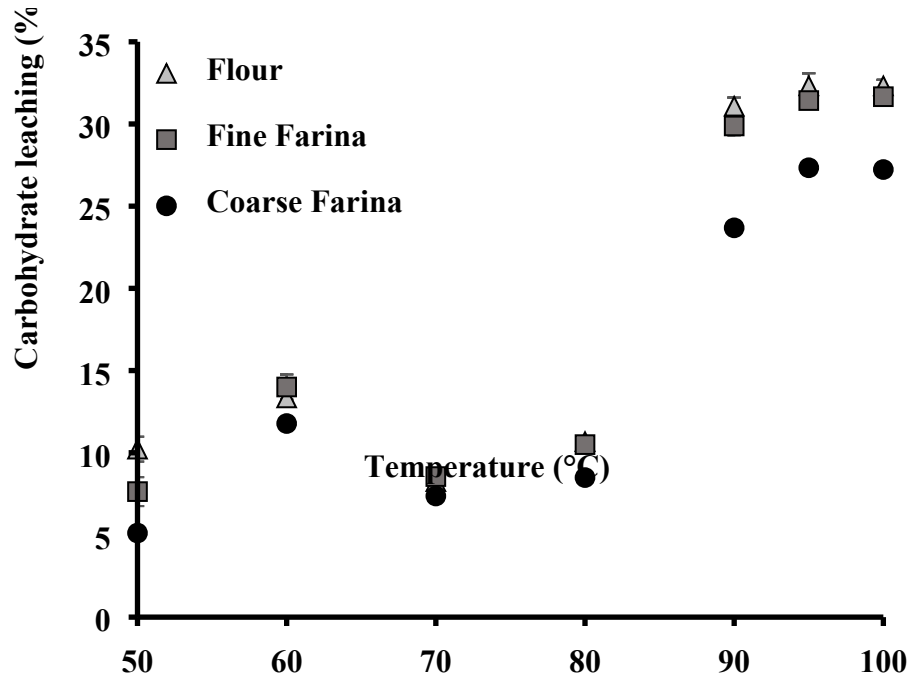

**Supplementary Figure 3.** Carbohydrate leaching (%) of flour (light grey triangle), fine (dark grey square) and coarse (black circle) farina as a function of temperature.
